# Supplementary material
Source: publisher site journal article supplement (https://www.dovepress.com/get_supplementary_file.php?f=392307.docx)

**Supplementary material**

| **Table S1. Comparison of postoperative vital signs between therapeutic intervention groups.** | | | | |
| --- | --- | --- | --- | --- |
|  | **Total, n=80** | **CA group, n= 40** | **ESPB group, n= 40** | **p value** |
| **Mean Arterial Pressure (mmHg)**** |  |  |  |  |
| 1 hour | 70.5 (61 - 79) | 70 (58 - 76) | 69 (63 - 80) | 0,5632 |
| 3 hours | 67 (60 - 74) | 65 (59 - 73) | 67 (62 - 78) | 0,1653 |
| 6 hours | 66.5 (60.5 – 73.5) | 67 (58 - 76) | 66 (61 - 73) | 0,9386 |
| 12 hours | 64 (58 - 74) | 63 (57 - 74) | 65 (60 - 76) | 0,4240 |
| 24 hours | 65 (58 - 76) | 65 (55 - 70) | 69 (59 - 78) | 0,1268 |
| **Heart Rate (bpm)**** |  |  |  |  |
| 1 hours | 26.51 (106 - 139) | 125 (107 - 139) | 128 (102 - 139) | 0,9348 |
| 3 hours | 127.5 (100 – 144.5) | 127 (101 - 141) | 129 (100 - 145) | 0,2412 |
| 6 hours | 120 (100 – 137.5) | 119 (100 - 137) | 120 (100 - 138) | 0,6648 |
| 12 hours | 119.5 (98 - 131) | 120 (100 - 134) | 117 (98 - 128) | 0,3005 |
| 24 hours | 120.5 (105 – 136.5) | 120 (105 - 137) | 122 (105 - 136) | 0,9157 |
| **Oxigen Saturation (%)**** |  |  |  |  |
| 1 hours | 99 (93.5 - 100) | 99 (96 - 100) | 98 (92 - 100) | 0,3507 |
| 3 hours | 98 (95 - 99) | 98 (95 - 99) | 98 (95 - 99) | 0,8266 |
| 6 hours | 98 (94.5 - 99) | 98 (95 - 99) | 98 (93 - 99) | 0,6928 |
| 12 hours | 98 (95 - 99) | 98 (95 - 100) | 98 (94 - 100) | 0,7920 |
| 24 hours | 98 (95 - 99) | 98 (95 - 99) | 98 (95 - 100) | 0,845 |
| ** Mediana (RIC) |  |  |  |  |
| **Mann Whitney  Note: mmHg: milimeters of mercury  Bpm: beats per minute |  |  |  |  |

**Figure S1**. COX regression model of in-hospital stay


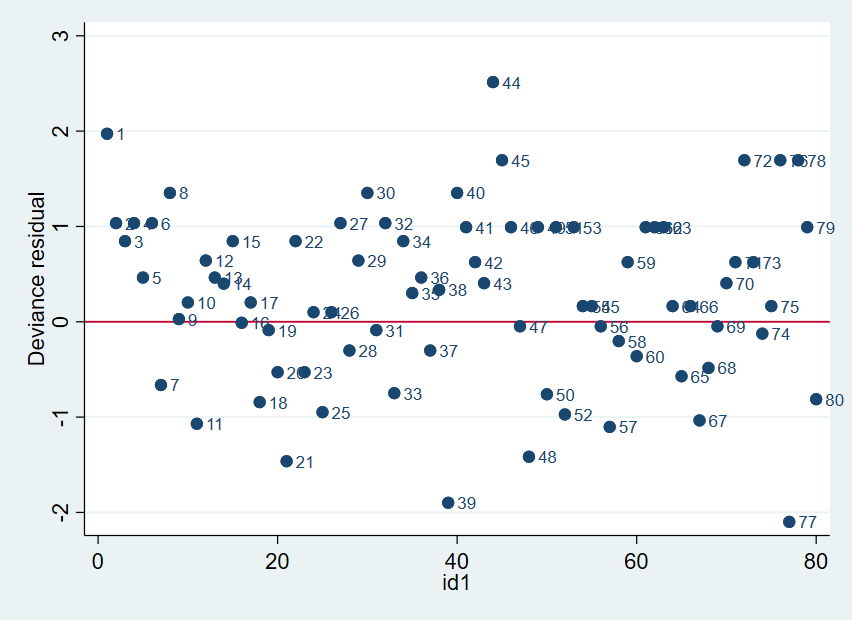


Observations above and over 2 deviance residuals were removed from the model. The model was rebuilt, and no variation was identified in the estimates of the hazard ratios. All data were preserved within the model.

**Figure S2**. Dependency verification assumptions in the COX regression model for in hospital stay


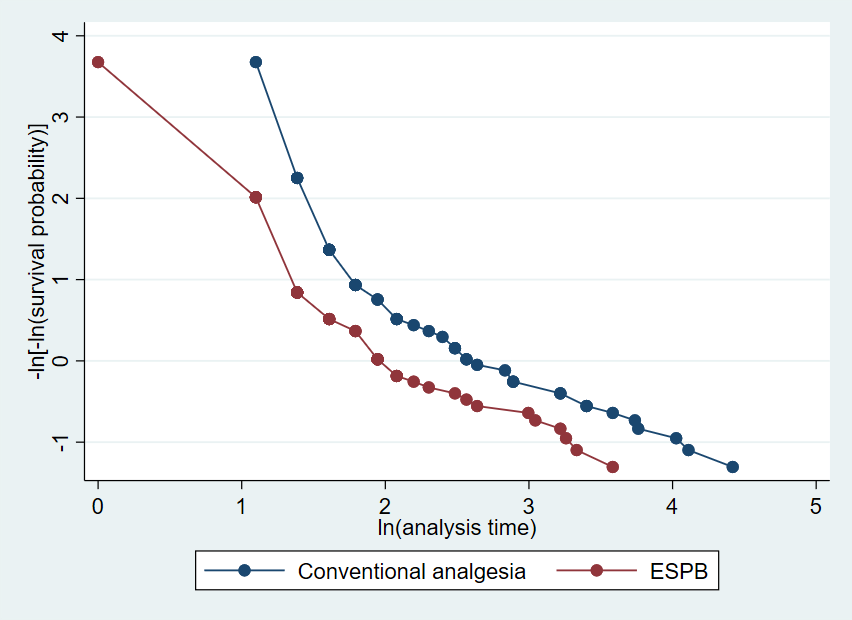


**Figure S3.** COX regression model of ICU stay


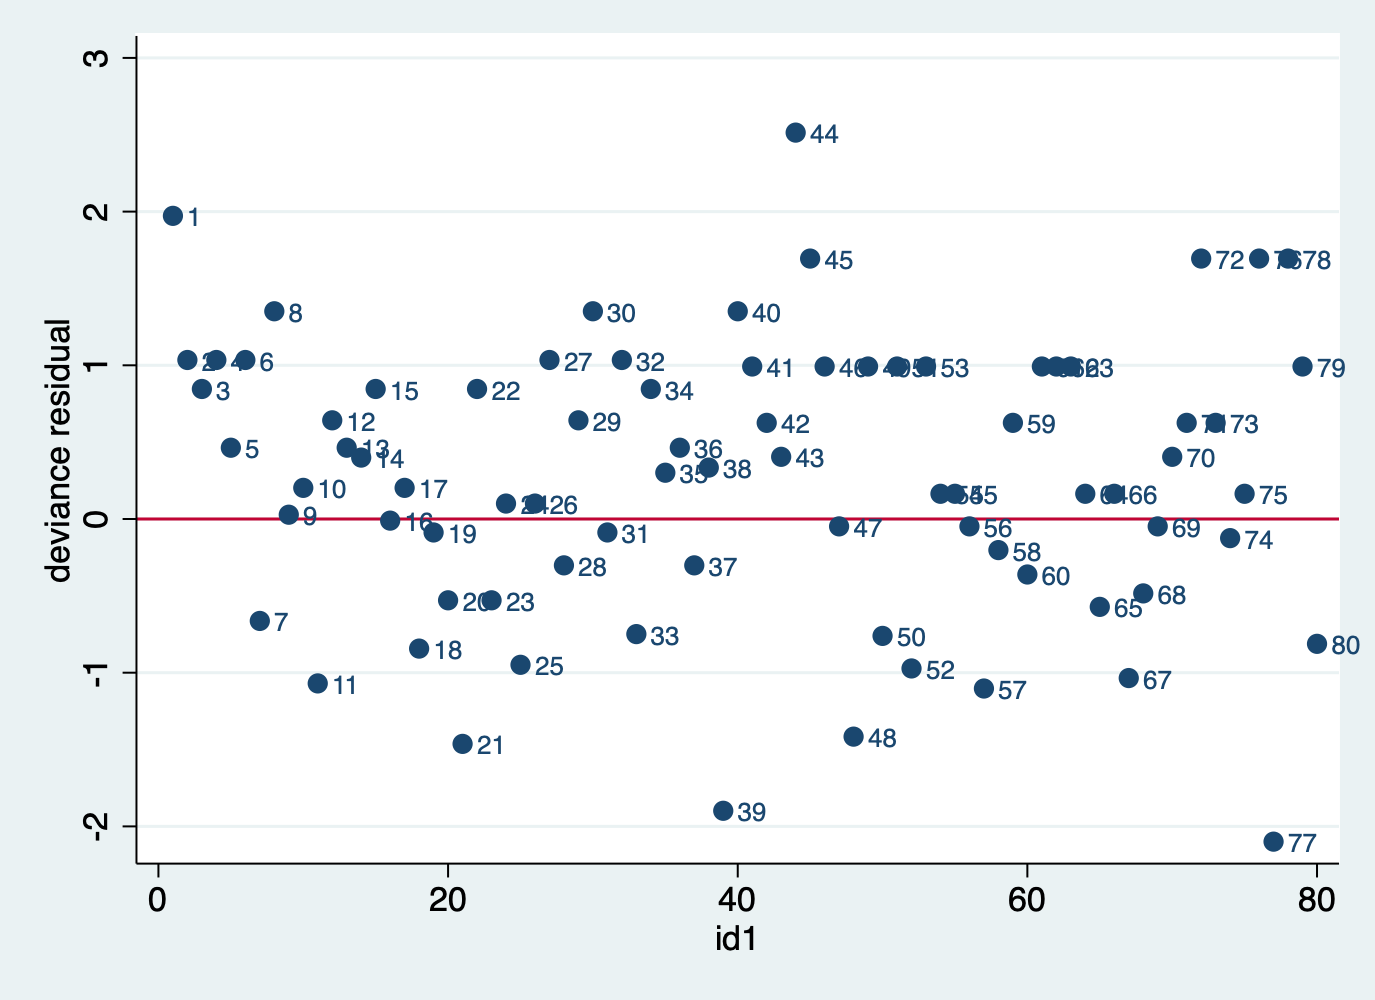


Observations above and over 2 deviance residuals were removed from the model. The model was rebuilt, and no variation was identified in the estimates of the hazard ratios. All data were preserved within the model.

**Figure S4.** Dependency verification assumptions in the COX regression model for ICU stay


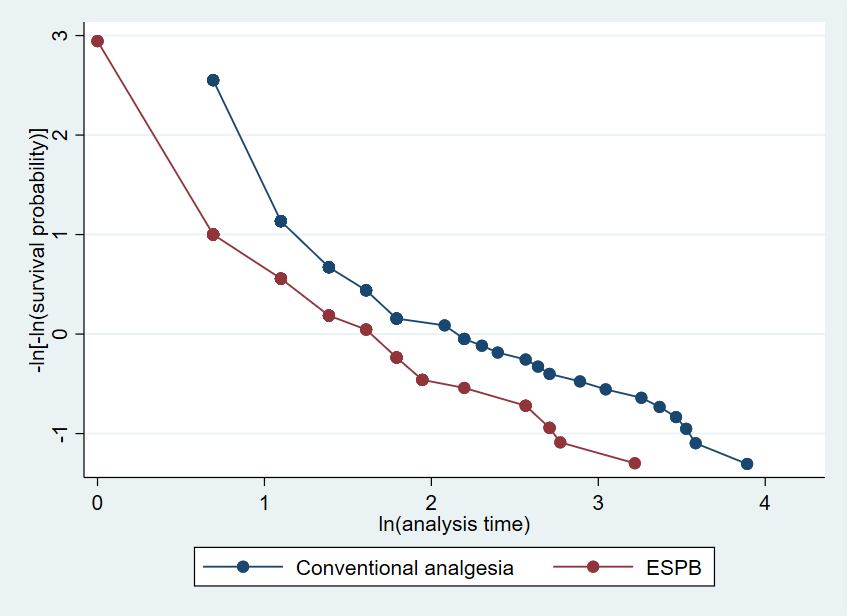

Supplement: Supplementary file 1 [file get_supplementary_file.php]
